# Supplementary material for: IPEC-J2 rMdr1a, a New Cell Line with Functional Expression of Rat P-glycoprotein Encoded by Rat Mdr1a for Drug Screening Purposes
Source: PubMed Central journal article supplement (PMC7408396; doi:10.3390/pharmaceutics12070673), 2020-07-17
Supplement: pharmaceutics-12-00673-s001.pdf [file pharmaceutics-12-00673-s001.pdf]

Article

# Supplementry Materials: IPEC-J2 rMdr1a and a New Cell Line with Functional Expression of Rat P-glycoprotein Encoded by Rat Mdr1a for Drug Screening Purposes

Lasse Saaby <sup>1,\*</sup>, Josefine Trasborg <sup>2</sup>, Mikkel A. Rasmussen <sup>1</sup>, Bjørn Holst <sup>1</sup> and Birger Brodin <sup>2</sup>

<sup>1</sup> Bioneer A/S, Kogle Alle 2, DK-2970 Hørsholm, Denmark

<sup>2</sup> Department of Pharmacy, University of Copenhagen, Universitetsparken 2, DK-2100 Copenhagen, Denmark

\* Correspondence: lsa@bioneer-farma.dk; Tel.: +45-35336325

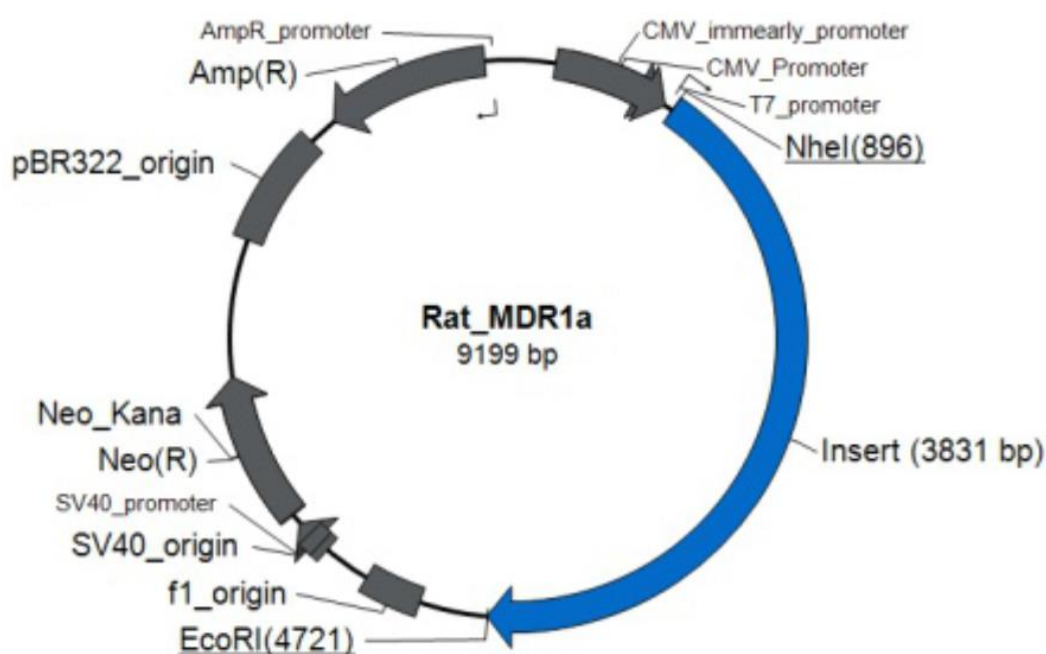

**Figure S1.** Graphical representation of the pcDNA 3.1(+) cloning vector encoding the rat Mdr1a gene.

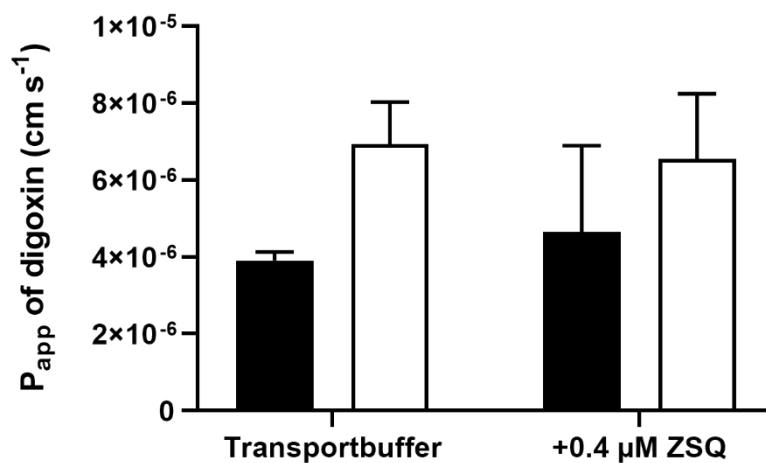

**Figure S2.** Bidirectional transport of digoxin across cell monolayers was measured in the presence or absence of the P-gp inhibitor, zosuquidar (ZSQ, 0.4 μM). Values are given as means ± SEM of 3 individual passages with 3 individual permeable supports for each passage and transport direction ( $n = 3$ ,  $N_{\text{total}} = 9$ ).

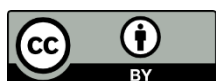

© 2020 by the authors. Submitted for possible open access publication under the terms and conditions of the Creative Commons Attribution (CC BY) license (<http://creativecommons.org/licenses/by/4.0/>).
